# Supplementary material for: The Revised Fibromyalgia Impact Questionnaire (FIQR): validation and psychometric properties
Source: PubMed Central journal article supplement (PMC2745803; doi:10.1186/ar2783), 2009-08-10
Supplement: ar2783-S1.pdf [file ar2783-S1.pdf]

## REVISED FIBROMYALGIA IMPACT QUESTIONNAIRE (FIQR)

**Last Name:**

**First Name:**

**Age:**

**Directions:** For each question, place an "X" in the box that best indicates how much your fibromyalgia made it difficult to do each of the following activities during the past 7 days

|                                        |                      |                                                                                                                                                                                                                                                                                                             |                       |
|----------------------------------------|----------------------|-------------------------------------------------------------------------------------------------------------------------------------------------------------------------------------------------------------------------------------------------------------------------------------------------------------|-----------------------|
| Brush or comb your hair                | <b>No difficulty</b> | <input type="checkbox"/> | <b>Very difficult</b> |
| Walk continuously for 20 minutes       | <b>No difficulty</b> | <input type="checkbox"/> | <b>Very difficult</b> |
| Prepare a homemade meal                | <b>No difficulty</b> | <input type="checkbox"/> | <b>Very difficult</b> |
| Vacuum, scrub or sweep floors          | <b>No difficulty</b> | <input type="checkbox"/> | <b>Very difficult</b> |
| Lift and carry a bag full of groceries | <b>No difficulty</b> | <input type="checkbox"/> | <b>Very difficult</b> |
| Climb one flight of stairs             | <b>No difficulty</b> | <input type="checkbox"/> | <b>Very difficult</b> |
| Change bed sheets                      | <b>No difficulty</b> | <input type="checkbox"/> | <b>Very difficult</b> |
| Sit in a chair for 45 minutes          | <b>No difficulty</b> | <input type="checkbox"/> | <b>Very difficult</b> |
| Go shopping for groceries              | <b>No difficulty</b> | <input type="checkbox"/> | <b>Very difficult</b> |

**Function sub-total**

*(for internal use only)*

**Directions:** For each question, check the one box that best describes the overall impact of your fibromyalgia over the last 7 days:

|                                                                 |              |                                                                                                                                                                                                                                                                                    |               |
|-----------------------------------------------------------------|--------------|------------------------------------------------------------------------------------------------------------------------------------------------------------------------------------------------------------------------------------------------------------------------------------|---------------|
| Fibromyalgia prevented me from accomplishing goals for the week | <b>Never</b> | <input type="checkbox"/> | <b>Always</b> |
| I was completely overwhelmed by my fibromyalgia symptoms        | <b>Never</b> | <input type="checkbox"/> | <b>Always</b> |

**Overall Impact sub-total**

*(for internal use only)*

**Directions:** For each of the following 10 questions, select the one circle that best indicates the intensity of your fibromyalgia symptoms over the past 7 days

|                                                                                     |                                                                                                                                                                                                                                                                                                                                                                                       |
|-------------------------------------------------------------------------------------|---------------------------------------------------------------------------------------------------------------------------------------------------------------------------------------------------------------------------------------------------------------------------------------------------------------------------------------------------------------------------------------|
| Please rate your level of pain                                                      | <b>No pain</b> <input type="checkbox"/> <b>Unbearable pain</b>            |
| Please rate your level of energy                                                    | <b>Lots of energy</b> <input type="checkbox"/> <b>No energy</b>           |
| Please rate your level of stiffness                                                 | <b>No stiffness</b> <input type="checkbox"/> <b>Severe stiffness</b>      |
| Please rate the quality of your sleep                                               | <b>Awoke well rested</b> <input type="checkbox"/> <b>Awoke very tired</b> |
| Please rate your level of depression                                                | <b>No depression</b> <input type="checkbox"/> <b>Very depressed</b>       |
| Please rate your level of memory problems                                           | <b>Good memory</b> <input type="checkbox"/> <b>Very poor memory</b>       |
| Please rate your level of anxiety                                                   | <b>Not anxious</b> <input type="checkbox"/> <b>Very anxious</b>           |
| Please rate your level of tenderness to touch                                       | <b>No tenderness</b> <input type="checkbox"/> <b>Very tender</b>          |
| Please rate your level of balance problems                                          | <b>No imbalance</b> <input type="checkbox"/> <b>Severe imbalance</b>      |
| Please rate your level of sensitivity to loud noises, bright lights, odors and cold | <b>No sensitivity</b> <input type="checkbox"/> <b>Extreme sensitivity</b> |

**Symptom sub-total**  
*(for internal use only)*

**FIQR TOTAL SCORE**  
*(for internal use only)*
