# Supplementary material for: The Revised Fibromyalgia Impact Questionnaire (FIQR): validation and psychometric properties
Source: PubMed Central journal article supplement (PMC2745803; doi:10.1186/ar2783), 2009-08-10
Supplement: ar2783-S2.pdf [file ar2783-S2.pdf]

## SYMPTOM IMPACT QUESTIONNAIRE (SIQR)

**Last Name:**

**First Name:**

**Age:**

**Directions:** For each question, place an "X" in the box that best indicates how much difficulty you have experienced in doing the following activities during the past 7 days.

|                                        |                      |                                                                                                                                                                                                                                                                                                                                      |                       |
|----------------------------------------|----------------------|--------------------------------------------------------------------------------------------------------------------------------------------------------------------------------------------------------------------------------------------------------------------------------------------------------------------------------------|-----------------------|
| Brush or comb your hair                | <b>No difficulty</b> | <input type="checkbox"/> | <b>Very difficult</b> |
| Walk continuously for 20 minutes       | <b>No difficulty</b> | <input type="checkbox"/> | <b>Very difficult</b> |
| Prepare a homemade meal                | <b>No difficulty</b> | <input type="checkbox"/> | <b>Very difficult</b> |
| Vacuum, scrub or sweep floors          | <b>No difficulty</b> | <input type="checkbox"/> | <b>Very difficult</b> |
| Lift and carry a bag full of groceries | <b>No difficulty</b> | <input type="checkbox"/> | <b>Very difficult</b> |
| Climb one flight of stairs             | <b>No difficulty</b> | <input type="checkbox"/> | <b>Very difficult</b> |
| Change bed sheets                      | <b>No difficulty</b> | <input type="checkbox"/> | <b>Very difficult</b> |
| Sit in a chair for 45 minutes          | <b>No difficulty</b> | <input type="checkbox"/> | <b>Very difficult</b> |
| Go shopping for groceries              | <b>No difficulty</b> | <input type="checkbox"/> | <b>Very difficult</b> |

**Sub-total** *(for internal use only)*

**Directions:** For each question, check the one box that best describes the overall impact of any medical problems over the last 7 days:

|                                                |               |                                                                                                                                                                                                                                                                                                             |               |
|------------------------------------------------|---------------|-------------------------------------------------------------------------------------------------------------------------------------------------------------------------------------------------------------------------------------------------------------------------------------------------------------|---------------|
| Was able to accomplish most set goals for week | <b>Always</b> | <input type="checkbox"/> | <b>Never</b>  |
| Was overwhelmed by symptoms                    | <b>Never</b>  | <input type="checkbox"/> | <b>Always</b> |

**Sub-total** *(for internal use only)*

**Directions:** For each question, check the one box that best indicates the intensity, during the past 7 days, of the following common symptoms.

|                                                                                     |                                                                                                                                                                                                                                                                                                                                                                                                                                         |
|-------------------------------------------------------------------------------------|-----------------------------------------------------------------------------------------------------------------------------------------------------------------------------------------------------------------------------------------------------------------------------------------------------------------------------------------------------------------------------------------------------------------------------------------|
| How severe has your pain been?                                                      | <b>No pain</b> <input type="checkbox"/> <b>Unbearable pain</b>            |
| How much were you fatigued or lacking in energy?                                    | <b>Lots of energy</b> <input type="checkbox"/> <b>No energy</b>           |
| How much has stiffness bothered you?                                                | <b>No stiffness</b> <input type="checkbox"/> <b>Severe stiffness</b>      |
| How did you feel on awakening in the morning?                                       | <b>Well rested</b> <input type="checkbox"/> <b>Very tired</b>             |
| How depressed or blue have you felt?                                                | <b>No depression</b> <input type="checkbox"/> <b>Very depressed</b>       |
| How much has memory and / or concentration been a problem?                          | <b>Not a problem</b> <input type="checkbox"/> <b>Severe problem</b>       |
| How stressed or anxious have you felt?                                              | <b>Not anxious</b> <input type="checkbox"/> <b>Very anxious</b>           |
| How much tenderness to touch have you felt?                                         | <b>No tenderness</b> <input type="checkbox"/> <b>Very tender</b>          |
| How much has balance and coordination been a problem (e.g. falling)?                | <b>No imbalance</b> <input type="checkbox"/> <b>Severe imbalance</b>      |
| How much environmental sensitivity have you had (e.g. noises, lights, odors, cold)? | <b>No sensitivity</b> <input type="checkbox"/> <b>Extreme sensitivity</b> |

**Sub-total** (for internal use only)

**SIQR TOTAL** (for internal use only)
